# Supplementary material for: Managing Care during the COVID-19 Pandemic: The Point of View and Fears of Pediatric Cancer Patients’ Families
Source: MDPI journal article supplement (doi:10.3390/children9040554), 2022-04-13
Supplement: s1 [file s1]

**Table S1.** Parents' and patients' characteristics.

|                                               | 1                    | 2                    | 3                    |
|-----------------------------------------------|----------------------|----------------------|----------------------|
| <b>Parents' age</b>                           |                      |                      |                      |
| Median (first and third quartile)             | 47.5 ( 39.0 - 51.2 ) | 50.5 ( 42.0 - 54.2 ) | 43.5 ( 40.0 - 48.0 ) |
| <b>Gender</b>                                 |                      |                      |                      |
| Female n(%)                                   | 24 ( 60.0 )          | 29 ( 72.5 )          | 33 ( 82.5 )          |
| Male n(%)                                     | 16 ( 40.0 )          | 11 ( 27.5 )          | 7 ( 17.5 )           |
| <b>Region</b>                                 |                      |                      |                      |
| Lombardia n(%)                                | 31 ( 77.5 )          | 33 ( 82.5 )          | 30 ( 75.0 )          |
| Other n(%)                                    | 9 ( 22.5 )           | 7 ( 17.5 )           | 10 ( 25.0 )          |
| <b>Educational qualifications*</b>            |                      |                      |                      |
| Secondary-school license n(%)                 | 9 ( 23.1 )           | 5 ( 12.5 )           | 7 ( 17.5 )           |
| High-school diploma n(%)                      | 23 ( 59.0 )          | 21 ( 52.5 )          | 20 ( 50.0 )          |
| University degree n(%)                        | 7 ( 17.9 )           | 14 ( 35.0 )          | 13 ( 32.5 )          |
| <b>Occupation*</b>                            |                      |                      |                      |
| Lower status employees n(%)                   | 6 ( 15.4 )           | 3 ( 7.5 )            | 6 ( 15.0 )           |
| Managers n(%)                                 | 1 ( 2.6 )            | 3 ( 7.5 )            | 4 ( 10.0 )           |
| Clerks and skilled service employees n(%)     | 8 ( 20.5 )           | 17 ( 42.5 )          | 13 ( 32.5 )          |
| Professionals n(%)                            | 11 ( 28.2 )          | 11 ( 27.5 )          | 10 ( 25.0 )          |
| Technicians and associated professionals n(%) | 2 ( 5.1 )            | 2 ( 5.0 )            | 0                    |
| Retired n(%)                                  | 1 ( 2.6 )            | 1 ( 2.5 )            | 0                    |
| Unemployed n(%)                               | 10 ( 25.6 )          | 3 ( 7.5 )            | 7 ( 17.5 )           |
| <b>Patients' age</b>                          |                      |                      |                      |
| Median (first and third quartile)             | 12.5 ( 10.0 - 16.2 ) | 13.0 ( 4.8 - 17.0 )  | 7.0 ( 2.8 - 16.0 )   |
| <b>Type of tumor</b>                          |                      |                      |                      |
| Soft tissue and bone sarcoma n(%)             | 21 ( 52.5 )          | 18 ( 45.0 )          | 15 ( 37.5 )          |
| Carcinoma and melanoma n(%)                   | 1 ( 2.5 )            | 1 ( 2.5 )            | 3 ( 7.5 )            |
| CNS tumor n(%)                                | 6 ( 15.0 )           | 7 ( 17.5 )           | 8 ( 20.0 )           |
| Lymphoma n(%)                                 | 6 ( 15.0 )           | 5 ( 12.5 )           | 5 ( 12.5 )           |
| Wilms' tumor and neuroblastoma n(%)           | 5 ( 12.5 )           | 7 ( 17.5 )           | 5 ( 12.5 )           |
| Others n(%)                                   | 1 ( 2.5 )            | 2 ( 5.0 )            | 4 ( 10.0 )           |

**Table S2.** Questionnaire 1: questions and answers.

| Item | Not at all<br>n(%) | Slightly<br>n(%) | Moderately/Fa<br>irly | Very much<br>n(%) | Extremely<br>n(%) |
|------|--------------------|------------------|-----------------------|-------------------|-------------------|
|------|--------------------|------------------|-----------------------|-------------------|-------------------|

|      |                                                                                                                                                                                                                                                                                                                | n(%)        |             |             |             |            |
|------|----------------------------------------------------------------------------------------------------------------------------------------------------------------------------------------------------------------------------------------------------------------------------------------------------------------|-------------|-------------|-------------|-------------|------------|
| q1.0 | Are you afraid your child might become infected with COVID-19?                                                                                                                                                                                                                                                 | 2 ( 5.0 )   | 4 ( 10.0 )  | 21 ( 52.5 ) | 5 ( 12.5 )  | 8 ( 20.0 ) |
| q1.0 | Are you afraid your child might have serious complications of a COVID-19 infection?                                                                                                                                                                                                                            | 2 ( 5.0 )   | 5 ( 12.5 )  | 23 ( 57.5 ) | 3 ( 7.5 )   | 7 ( 17.5 ) |
| q1.0 | Are you afraid of becoming infected with COVID-19 yourself?                                                                                                                                                                                                                                                    | 3 ( 7.5 )   | 10 ( 25.0 ) | 20 ( 50.0 ) | 2 ( 5.0 )   | 5 ( 12.5 ) |
| q1.0 | Are you afraid of developing serious complications?                                                                                                                                                                                                                                                            | 3 ( 7.5 )   | 11 ( 27.5 ) | 14 ( 35.0 ) | 8 ( 20.0 )  | 4 ( 10.0 ) |
| q1.0 | Have you experienced the threat of COVID-19 with anguish?                                                                                                                                                                                                                                                      | 4 ( 10.0 )  | 5 ( 12.5 )  | 16 ( 40.0 ) | 11 ( 27.5 ) | 4 ( 10.0 ) |
| q1.0 | Do you think that the changes imposed on society (i.e. closure of shops, gatherings forbidden, stay-home rules except for demonstrable reasons of necessity) have had a strong impact on your daily life?                                                                                                      | 4 ( 10.0 )  | 9 ( 22.5 )  | 16 ( 40.0 ) | 6 ( 15.0 )  | 5 ( 12.5 ) |
| q1.0 | Compared to the time before the pandemic, did you experience difficulties or worries about your economic situation being aggravated by having a sick child?                                                                                                                                                    | 13 ( 32.5 ) | 10 ( 25.0 ) | 11 ( 27.5 ) | 4 ( 10.0 )  | 2 ( 5.0 )  |
| q1.0 | Do you think there have been family conflicts and communication difficulties in connection with the pandemic?                                                                                                                                                                                                  | 20 ( 50.0 ) | 13 ( 32.5 ) | 4 ( 10.0 )  | 3 ( 7.5 )   | 0 ( 0 )    |
| q1.0 | Do you think being unable to physically attend school (all grades) was a problem for your child?                                                                                                                                                                                                               | 13 ( 32.5 ) | 6 ( 15.0 )  | 12 ( 30.0 ) | 5 ( 12.5 )  | 4 ( 10.0 ) |
| q1.1 | ... and for your family?                                                                                                                                                                                                                                                                                       | 12 ( 30.0 ) | 12 ( 30.0 ) | 9 ( 22.5 )  | 3 ( 7.5 )   | 4 ( 10.0 ) |
| q1.1 | Do you think the suspension of games, sports and social activities outside the hospital was a problem for your child?                                                                                                                                                                                          | 7 ( 17.5 )  | 8 ( 20.0 )  | 18 ( 45.0 ) | 5 ( 12.5 )  | 2 ( 5.0 )  |
| q1.1 | ... and for your family?                                                                                                                                                                                                                                                                                       | 5 ( 12.5 )  | 13 ( 32.5 ) | 14 ( 35.0 ) | 5 ( 12.5 )  | 3 ( 7.5 )  |
| q1.1 | Do you think the lack of family ties due to the pandemic (isolation from grandparents, less contact with social networks) has been a problem for your child and for your family in general?                                                                                                                    | 2 ( 5.0 )   | 7 ( 17.5 )  | 17 ( 42.5 ) | 5 ( 12.5 )  | 9 ( 22.5 ) |
| q1.1 | Do you think the way the pediatric outpatient clinic coped with the emergency (telephone calls to provide updates on a patient's state of health, reserved entrances, body temperature screening at entrance, distribution of hand sanitizer, distribution of face masks) was inadequate, given the situation? | 11 ( 27.5 ) | 23 ( 57.5 ) | 6 ( 15.0 )  | 0 ( 0 )     | 0 ( 0 )    |
| q1.1 | Do you think the changes made to the procedures for managing admissions and outpatient visits (telephone screening,                                                                                                                                                                                            | 11 ( 27.5 ) | 19 ( 47.5 ) | 9 ( 22.5 )  | 0 ( 0 )     | 1 ( 2.5 )  |

|           |                                                                                                                                                                                                                                       |             |             |             |             |             |
|-----------|---------------------------------------------------------------------------------------------------------------------------------------------------------------------------------------------------------------------------------------|-------------|-------------|-------------|-------------|-------------|
|           | strict time slots, separation of routes for different patients' needs, "telephone visits") had a negative effect?                                                                                                                     |             |             |             |             |             |
| q1.1<br>6 | Do you think the strict time slot in the outpatient clinic gave doctors less time to devote to your child?                                                                                                                            | 10 ( 25.0 ) | 10 ( 25.0 ) | 19 ( 47.5 ) | 0 ( 0 )     | 1 ( 2.5 )   |
| q1.1<br>7 | Do you think a hospital stay in a single room is less preferable for you?                                                                                                                                                             | 15 ( 37.5 ) | 14 ( 35.0 ) | 8 ( 20.0 )  | 0 ( 0 )     | 3 ( 7.5 )   |
| q1.1<br>8 | ... and for your child?                                                                                                                                                                                                               | 16 ( 40.0 ) | 11 ( 27.5 ) | 9 ( 22.5 )  | 2 ( 5.0 )   | 2 ( 5.0 )   |
| q1.1<br>9 | Do you think allowing only one parent to stay in hospital with a child (without the opportunity for parents to change places) was a source of difficulty for your family (i.e. for other children left at home with only one parent)? | 9 ( 22.5 )  | 7 ( 17.5 )  | 7 ( 17.5 )  | 6 ( 15.0 )  | 11 ( 27.5 ) |
| q1.2<br>0 | ... and for your child (i.e. always staying in hospital with mum, without being able to see dad, or vice versa)?                                                                                                                      | 8 ( 20.0 )  | 7 ( 17.5 )  | 7 ( 17.5 )  | 10 ( 25.0 ) | 8 ( 20.0 )  |
| q1.2<br>1 | Do you think banning visits from family and friends during hospital stays was a problem for your family?                                                                                                                              | 10 ( 25.0 ) | 9 ( 22.5 )  | 9 ( 22.5 )  | 4 ( 10.0 )  | 8 ( 20.0 )  |
| q1.2<br>2 | ... and for your child?                                                                                                                                                                                                               | 9 ( 22.5 )  | 9 ( 22.5 )  | 10 ( 25.0 ) | 3 ( 7.5 )   | 9 ( 22.5 )  |
| q1.2<br>3 | Do you think the reduction of games and educational activities to support community life on the ward was a problem for your family?                                                                                                   | 7 ( 17.9 )  | 10 ( 25.6 ) | 10 ( 25.6 ) | 6 ( 15.4 )  | 6 ( 15.4 )  |
| q1.2<br>4 | ... and for your child?                                                                                                                                                                                                               | 6 ( 15.0 )  | 12 ( 30.0 ) | 11 ( 27.5 ) | 6 ( 15.0 )  | 5 ( 12.5 )  |
| q1.2<br>5 | Do you think conducting supportive interviews with doctors and psychologists while wearing personal protective equipment (such as masks) and adopting distancing measures was unsatisfactory?                                         | 8 ( 20.0 )  | 19 ( 47.5 ) | 12 ( 30.0 ) | 0 ( 0 )     | 1 ( 2.5 )   |
| q1.2<br>6 | Do you think conducting supportive interviews with doctors and psychologists while adopting distancing measures may have created potential opportunities for misunderstandings, undermining the effectiveness of such interventions?  | 18 ( 45.0 ) | 6 ( 15.0 )  | 7 ( 17.5 )  | 7 ( 17.5 )  | 2 ( 5.0 )   |
| q1.2<br>7 | During the pandemic did you perceive an increase in the level of stress among care operators?                                                                                                                                         | 12 ( 30.0 ) | 9 ( 22.5 )  | 15 ( 37.5 ) | 3 ( 7.5 )   | 1 ( 2.5 )   |
| q1.2<br>8 | In your experience during the pandemic, do you feel that you received less attention during your child's cancer treatment?                                                                                                            | 34 ( 85.0 ) | 1 ( 2.5 )   | 4 ( 10.0 )  | 1 ( 2.5 )   | 0 ( 0 )     |
| q1.2<br>9 | In your experience during the pandemic, do you feel that you received less                                                                                                                                                            | 30 ( 75.0 ) | 5 ( 12.5 )  | 3 ( 7.5 )   | 1 ( 2.5 )   | 1 ( 2.5 )   |

| attention regarding the psychosocial sphere? |                                                                                                                   |             |            |           |           |           |
|----------------------------------------------|-------------------------------------------------------------------------------------------------------------------|-------------|------------|-----------|-----------|-----------|
| q1.3<br>0                                    | In your experience during the pandemic, do you feel that you received less attention in the area of nursing care? | 36 ( 90.0 ) | 2 ( 5.0 )  | 2 ( 5.0 ) | 0 ( 0 )   | 0 ( 0 )   |
| q1.3<br>1                                    | Do you think the COVID-19 pandemic has affected the quality of care your child received?                          | 33 ( 82.5 ) | 4 ( 10.0 ) | 0 ( 0 )   | 2 ( 5.0 ) | 1 ( 2.5 ) |
| q1.3<br>2                                    | Do you feel that concern about the COVID-19 pandemic has outweighed concern about your child's illness?           | 30 ( 75.0 ) | 9 ( 22.5 ) | 1 ( 2.5 ) | 0 ( 0 )   | 0 ( 0 )   |

**Table S3.** Details of the p-values obtained with Fisher's exact test (F) and the Wilcoxon-Mann-Whitney test.(WMW).

|    | Item                                                                                                                                                                   | p-value F  | p-value WMW |
|----|------------------------------------------------------------------------------------------------------------------------------------------------------------------------|------------|-------------|
| 1  | Do you consider the medical care to have been clinically satisfactory?                                                                                                 | 0.232      | 0.179       |
| 2  | Do you think the medical care was satisfactory in terms of communication?                                                                                              | 0.358      | 0.264       |
| 3  | Do you think the time spent by doctors during outpatient visits was adequate?                                                                                          | 0.547      | 0.773       |
| 4  | Do you think the time spent by doctors during inpatient visits was adequate?                                                                                           | 0.830      | 0.629       |
| 5  | Do you think the nursing care was satisfactory?                                                                                                                        | 0.421      | 0.199       |
| 6  | Do you feel you received the psychological support you needed during your child's treatments?                                                                          | 0.921      | 0.412       |
| 7  | Do you think the way the psychologists on the ward interact was adequate?                                                                                              | 0.145      | 0.846       |
| 8  | Do you think that the social support offered on the ward is helpful?                                                                                                   | 0.564      | 0.631       |
| 9  | Do you think the educational support (school in hospital) is satisfactory? *                                                                                           | 0.233      | 0.071       |
| 10 | Do you think the games / educational activities are useful?                                                                                                            | 0.345      | 0.252       |
| 11 | Do you think the relationships on the ward (between parents) have been helpful?                                                                                        | < 0.001*** | < 0.001***  |
| 12 | Do you consider the organization and rules of the department to be adequate?                                                                                           | 0.776      | 0.358       |
| 13 | Do you think the organization of the outpatient clinic (time slots, waiting room, time available for visits) is adequate?                                              | 0.612      | 0.747       |
| 14 | Do you think the staff have too high a workload?                                                                                                                       | 0.008**    | 0.003**     |
| 15 | Do you think the staff have too high an emotional load?                                                                                                                | 0.716      | 0.292       |
| 16 | Do you think your child's illness and treatment have had a significant impact on your family's economic conditions?                                                    | 0.642      | 0.873       |
| 17 | Do you feel your child's illness and treatment have had a significant impact on your family relationships?                                                             | 0.330      | 0.097       |
| 18 | Do you think the role of family (grandparents and uncles) and social (friends) emotional resources has been crucial to coping with your child's disease and treatment? | 0.078      | 0.449       |
